# Supplementary material for: The one-step preparation of green-emission carbon dots based on the deactivator-reducing reagent synergistic effect and the study on their luminescence mechanism
Source: Royal Society of Chemistry journal article supplement (doi:10.1039/c8ra03353f), 2018-01-01
Supplement: c8ra03353f1.pdf [file c8ra03353f1.pdf]

## Supporting Information

### The one-step preparation of green-emitted carbon dots based on the deactivator-reducing reagent synergistic effect and the study on their luminescence mechanism

Chunjin Wei <sup>a,b</sup>, Jun Li <sup>a,b</sup>, Xincai Xiao <sup>a,b</sup>, Tong Yue <sup>a,b</sup>, Dan Zhao <sup>a,b</sup> \*

<sup>a</sup> School of Pharmaceutical Sciences, South-Central University for Nationalities, Wuhan 430074, P. R. China

<sup>b</sup> National Demonstration Center for Experimental Ethnopharmacology Education (South-Central University for Nationalities), Wuhan 430074, P. R. China

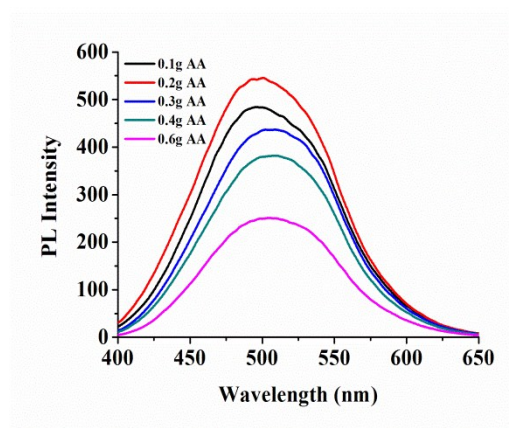

Fig. S1. Impacts of different amount of AA on the fluorescence intensity of CDs <sub>(AA-PEI)</sub> .

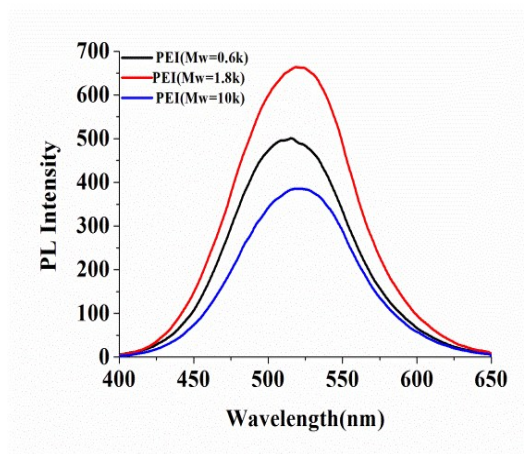

Fig. S2. Impacts of different molecular weight of PEI on the fluorescence intensity of CDs <sub>(AA-PEI)</sub> .

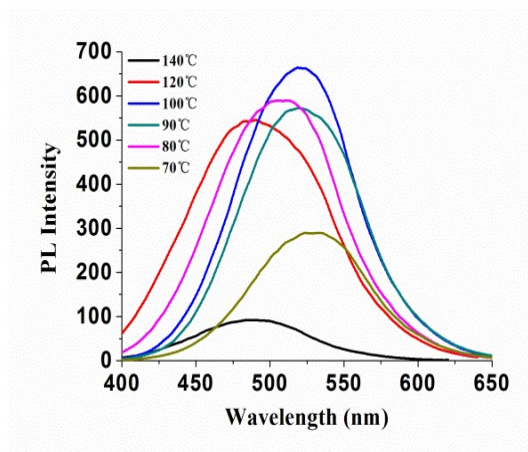

Fig. S3. Impacts of reaction temperature on the fluorescence intensity of  $CDs_{(AA-PEI)}$ .

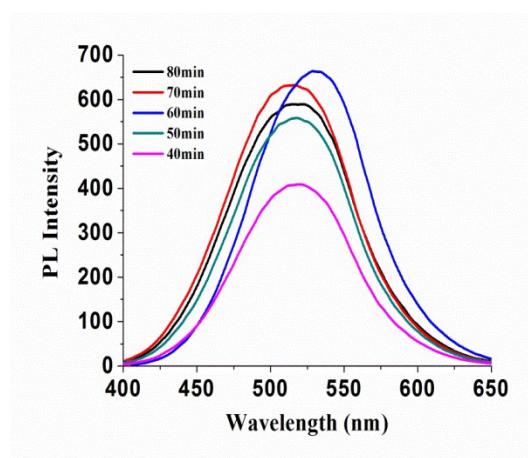

Fig. S4. Impacts of reaction time on the fluorescence intensity of  $CDs_{(AA-PEI)}$ .

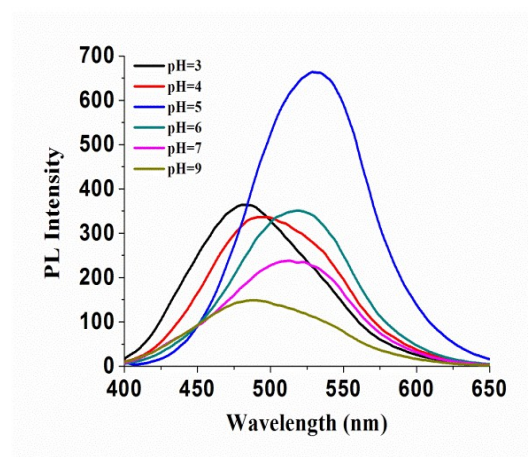

Fig. S5. Impacts of pH values on the fluorescence intensity of  $CDs_{(AA-PEI)}$ .

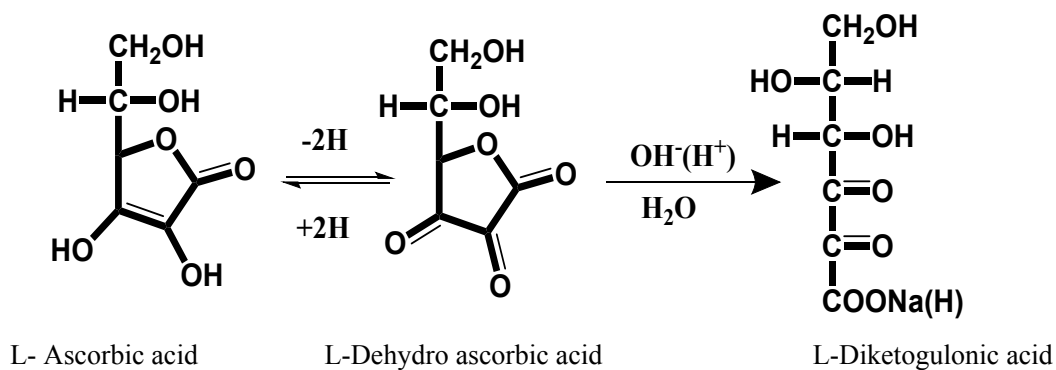

Fig. S6. The oxidation process of ascorbic acid.

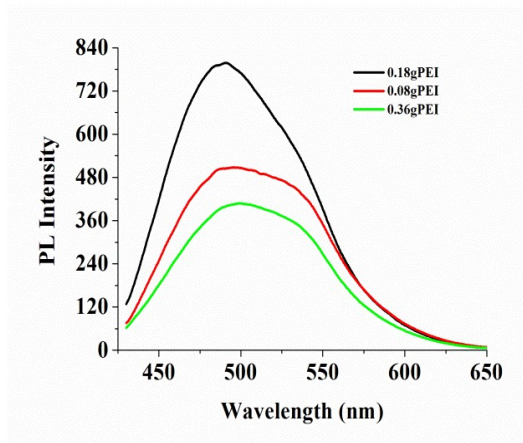

Fig. S7. Impacts of different amount of PEI on the fluorescence intensity of CDs (AA-PEI-CA) .

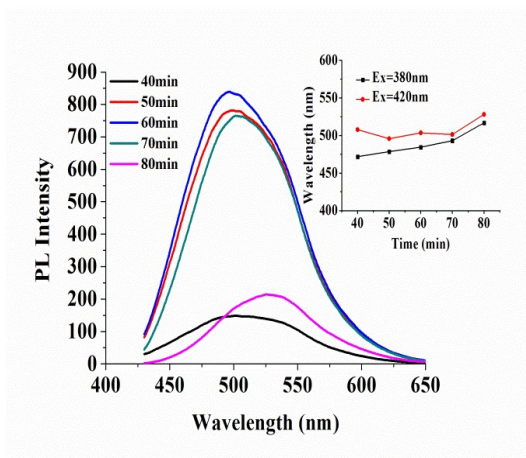

Fig. S8. Impacts of reaction time on the fluorescence intensity of CDs (AA-PEI-CA) .

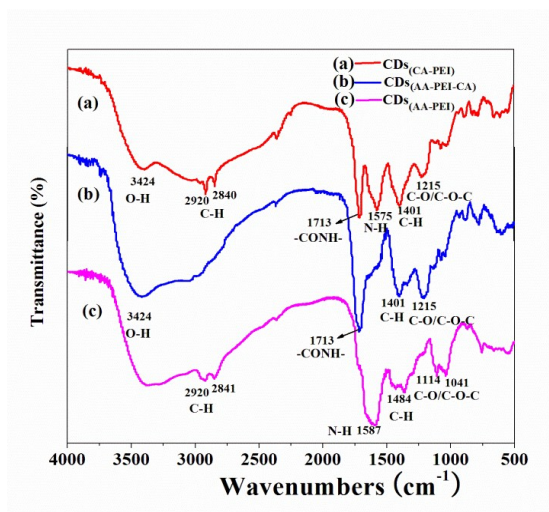

Fig. S9. IR spectra of CD<sub>s</sub>(AA-PEI-CA), CD<sub>s</sub>(AA-PEI) and CD<sub>s</sub>(PEI-CA).

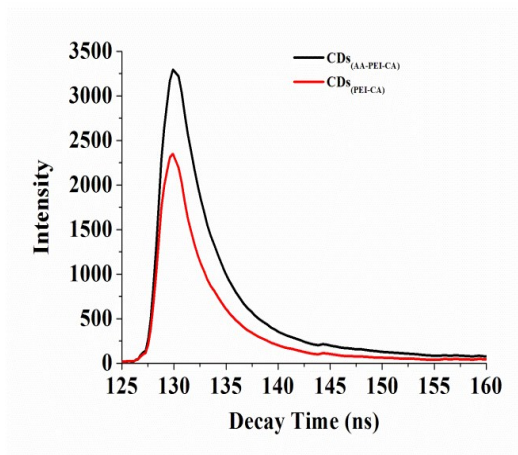

Fig. S10. Fluorescence decay curves of CD<sub>s</sub>(AA-PEI-CA) and CD<sub>s</sub>(AA-PEI).
